# Supplementary material for: Anti-Inflammatory and Anti-Apoptotic Effects of Acer Palmatum Thumb. Extract, KIOM-2015EW, in a Hyperosmolar-Stress-Induced In Vitro Dry Eye Model
Source: MDPI journal article supplement (doi:10.3390/nu10030282), 2018-02-28
Supplement: s1 [file s1]

Supplementary

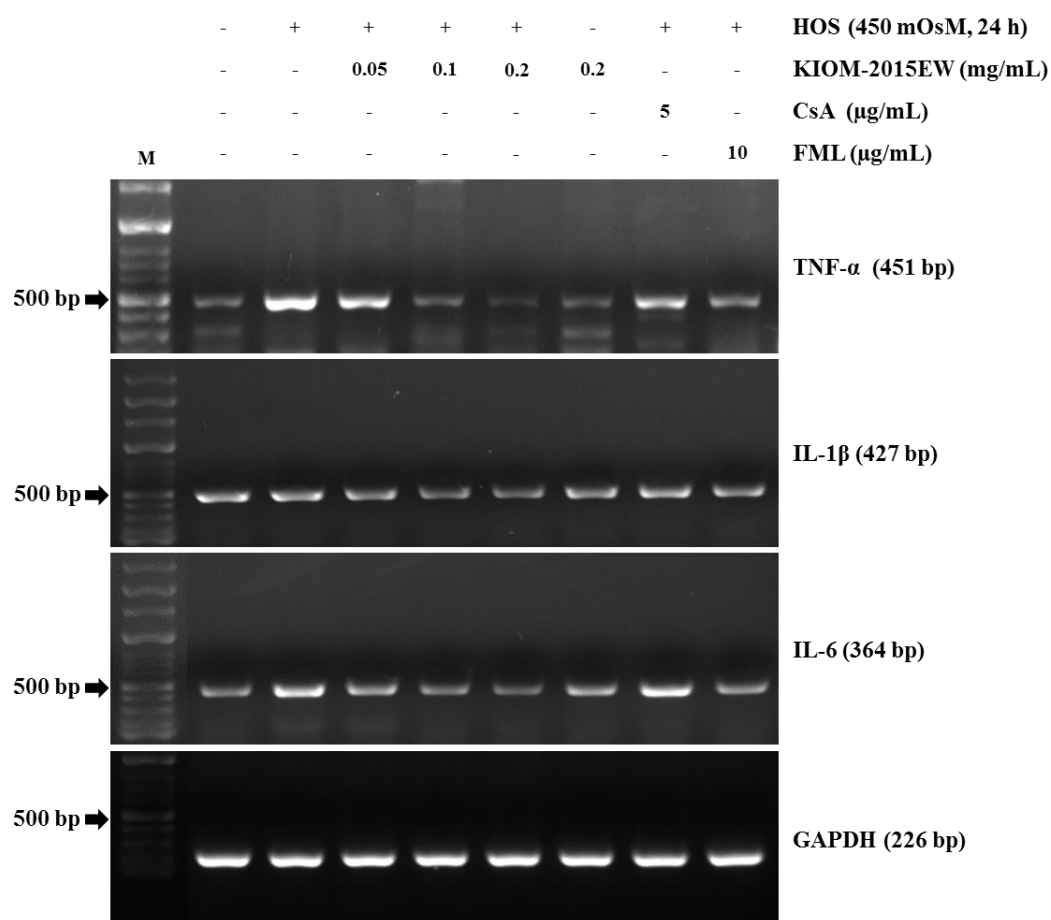

**Figure S1.** KIOM-2015EW regulates mRNA of proinflammatory cytokines in HOS-induced HCECs. This is a full length image of the cropped blots presented in the Figure 2C.

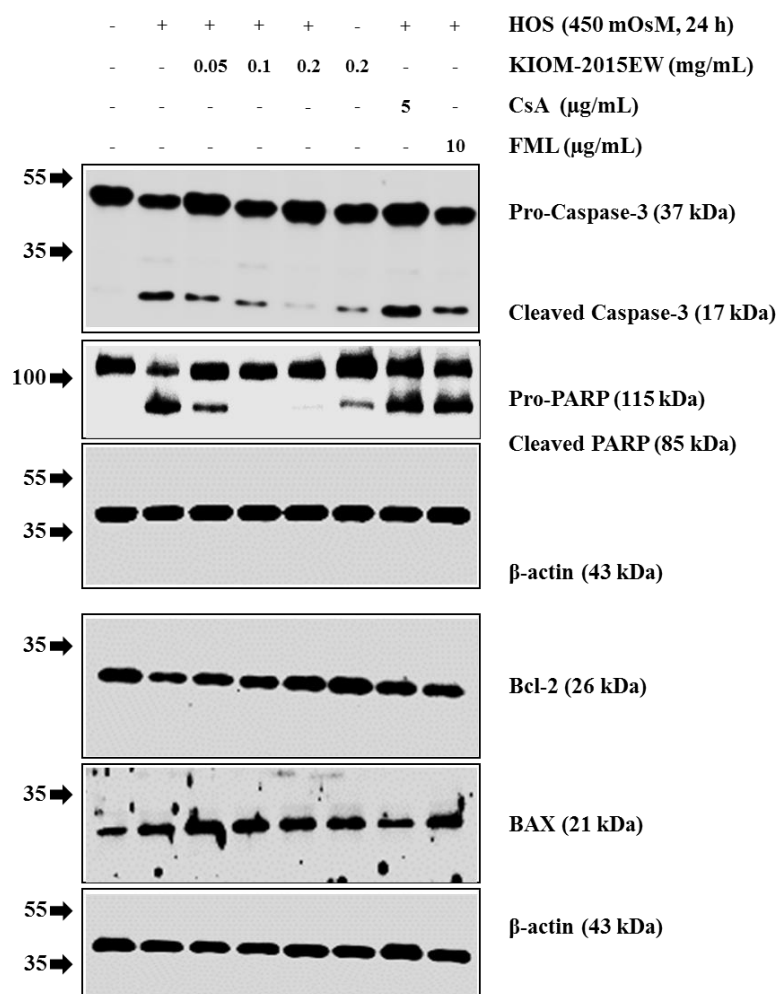

**Figure S2.** KIOM-2015EW reduces HOS-induced apoptotic cell death in HCECs. This is a full length image of the cropped blots presented in the Figure 3C.

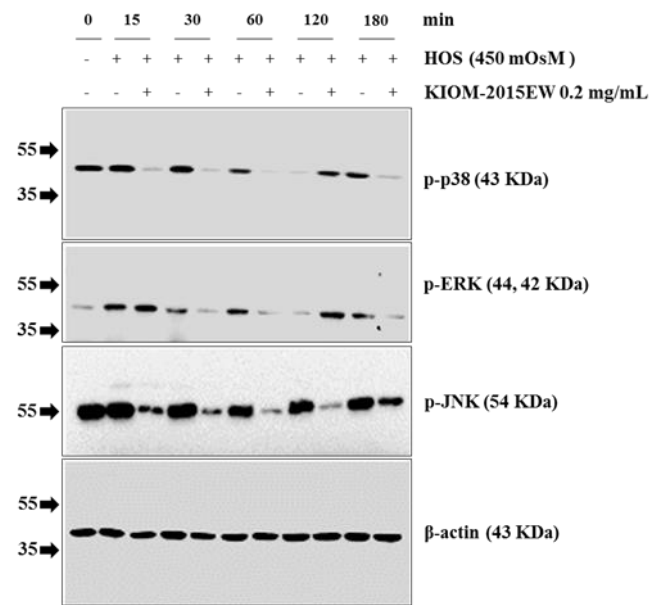

(A)

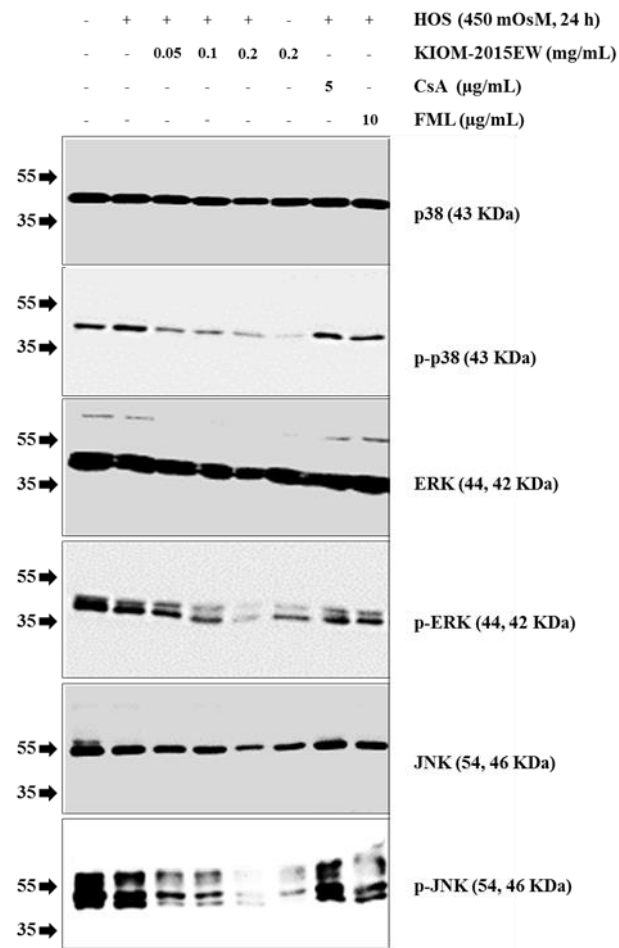

(B)

**Figure S3.** KIOM-2015EW regulates HOS-induced MAPK phosphorylation. (A) is an uncropped image for Figure. 4A, (B) is an uncropped image for Figure. 4B.

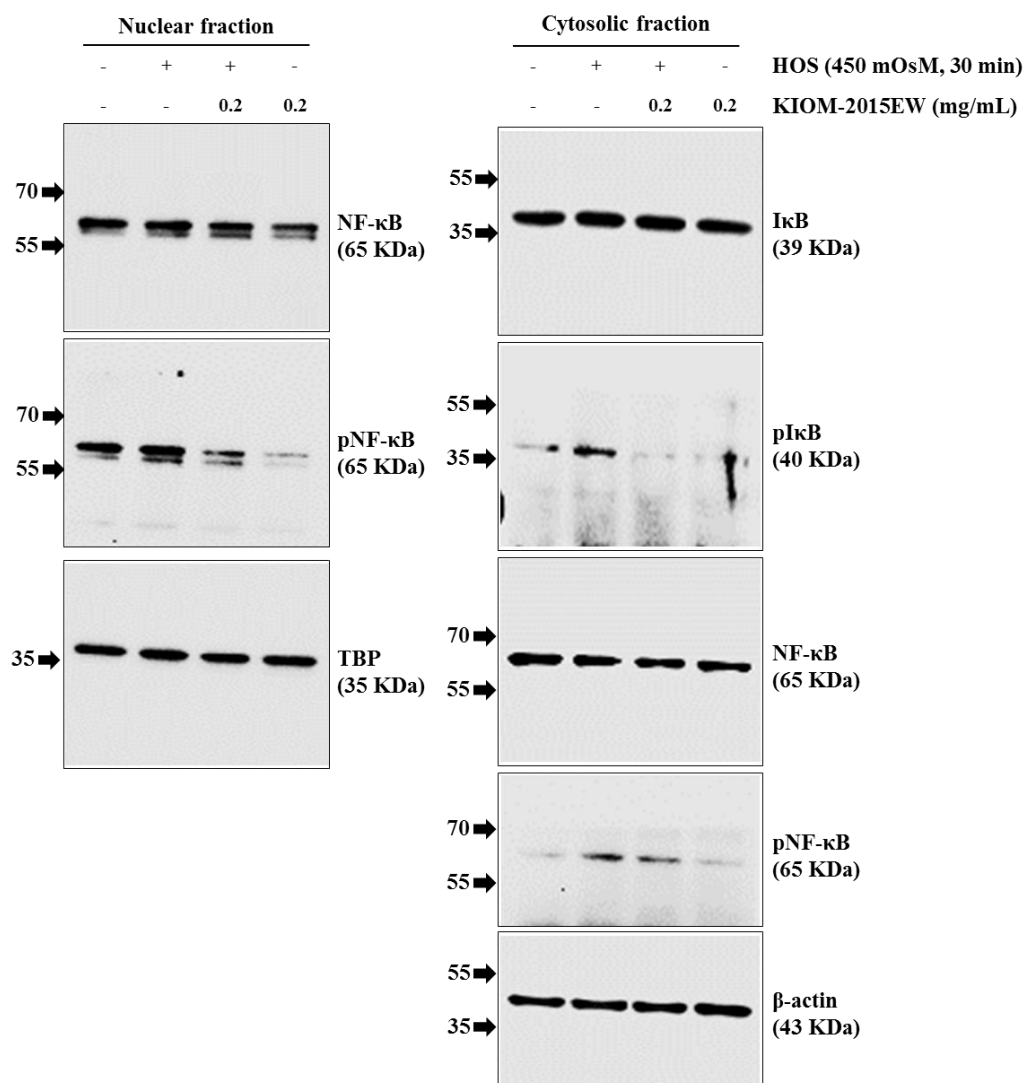

**Figure S4.** KIOM-2015EW regulates the phosphorylation and nuclear translocation of NF-κB in HOS-induced HCECs. This is a full length image of the cropped blots presented in the Figure 6A.

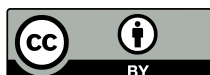

© 2018 by the authors. Submitted for possible open access publication under the terms and conditions of the Creative Commons Attribution (CC BY) license (<http://creativecommons.org/licenses/by/4.0/>).
